# Supplementary material
Source: publisher site journal article supplement (https://en-cdn.bio-protocol.org/attached/file/20191125/Supplemental.xlsx)
Supplement: Supplementary file 1 [file Supplemental.xlsx]

## Sheet: Sheet1
Table 1. Use this template to calculate the concentration of your nuclear lysates. Simply input your BSA and sample A(595) values below and update the formula using the equation on the above chart. The concentration is divide by 2 because we typically quantify 2 µl of lysates.
BSA standard curve
A(595)	µg BSA
0.209	2.5
0.405	5
0.604	7.5
0.993	12
Lysate quantification
Sample	A(595)	Concentration µg/µl (update the formula using the equation on the chart above)
mESC/untreated	0.401	2.4573
mESC/Benzonase	0.453	2.77177
…
…
